# Supplementary material for: Rice aquaporin PIP1;3 and harpin Hpa1 of bacterial blight pathogen cooperate in a type III effector translocation
Source: PubMed Central journal article supplement — J Exp Bot. 2019 Mar 28;70(12):3057–73. doi: 10.1093/jxb/erz130 (PMC6598099; doi:10.1093/jxb/erz130), 2019-03-28
Supplement: erz130_suppl_supplementary_figures_s1-s8_table_s1.pdf [file erz130_suppl_supplementary_figures_s1-s8_table_s1.pdf]

# Aquaporin PIP1;3 of rice and harpin Hpa1 of bacterial blight pathogen cooperate in a type III effector translocation

Ping Li, Liyuan Zhang, Xuyan Mo, Hongtao Ji, Yiqun Hu, Taha Majid, Juying Long, Hao Pang, Yuan Tao, Huijie Bian, Jinbiao Ma and Hansong Dong

## Supplementary Data

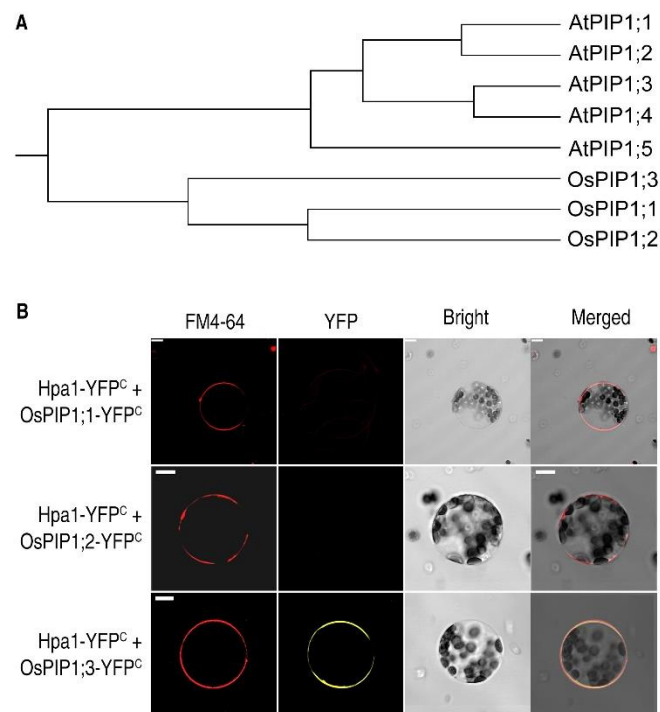

**Fig. S1.** A phylogenetic tree of Arabidopsis and rice PIP1s established by the MEGA4 program (A) and BiFC tests of OsPIP1s and Hpa1 (B).

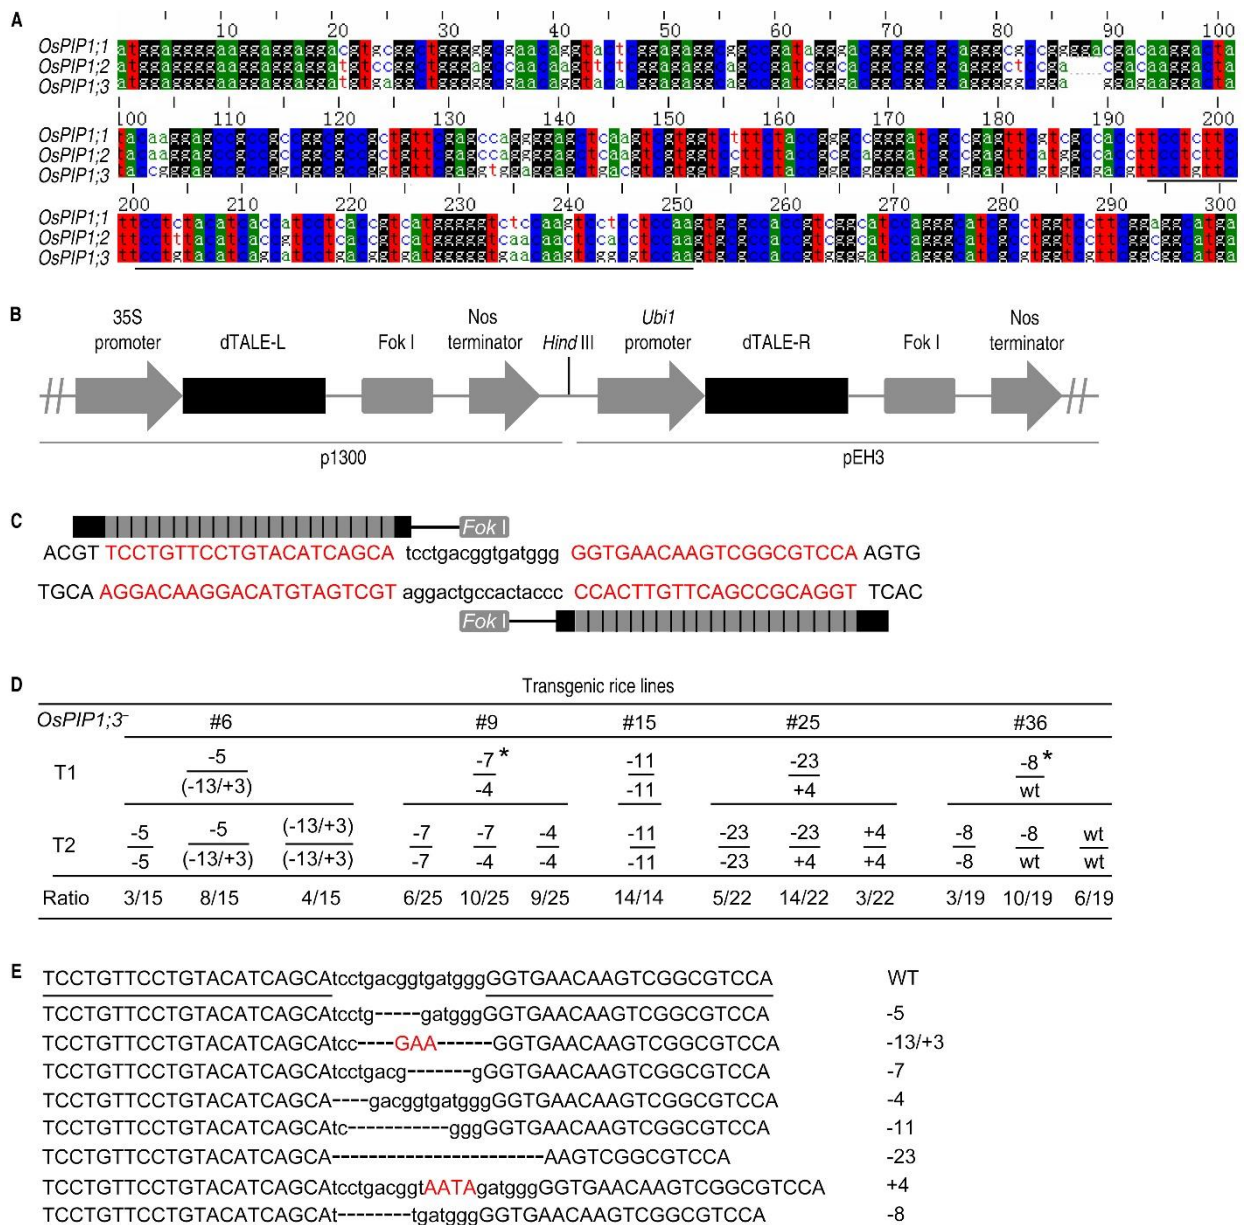

**Fig. S2.** Analyses of *OsPIP1;3* knockout by TALENs. (A) Selection of designer TALEN target sites according to *OsPIP1;3* sequence analysis. *OsPIP1;1–3* nucleotide sequences were aligned by BioEdit. The underlined sequence region was selected as target of designer TALENs. (B) Schematic diagram of a two-gene expression cassette in a single binary vector designed for *Agrobacterium*-mediated rice transformation. The expression cassette includes 35S promoter to drive expression of the TALEN-L gene and *Ubi1* promoter to direct transcription of the TALEN-R gene. (C) Designer TALEN constructs and their DNA targets in 191–247 sites of chromosomal *OsPIP1;3* gene. Lowercase letters represent regions wherein two *FokI* domains dimerize to cause a double stranded DNA break. (D) Genetic segregation of T1 and T2 plants derived from self-pollination of 5 independent T0 primary transgenic plants. Totally 40 independent T0 primary transgenic plants were defined as #1–40 transgenic lines. Each of the two alleles of an individual plant are designated as being wild type (wt) or as having a nucleotide insertion (+) or a deletion

(-) and are separated top and bottom by a dividing line. The designation “-5/(-13/+3)” indicates that one allele contains a deletion of 5 bp and that the other allele has both a deletion of 13 bp and an insertion of 3 bp. Asterisks denote that T1 progenies from lines #9 or #36 lack any selection marker and TALEN gene. The hygromycin resistance gene and TALEN genes were not detected by PCR assays in these TALEN-modified T1 rice plants or their self-pollinated progenies. (E) Sequences of *OsPIP1;3* mutations induced by the designer TALENs with deletions (dashes) and insertions (red letters). TALEN-binding sequences are underlined in WT.

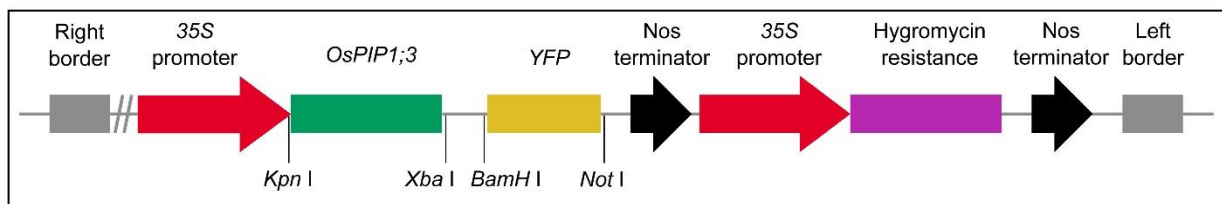

**Fig. S3.** Schematic diagram of *OsPIP1;3* overexpression construction. Recombinant gene cassette was designed for rice embryo transformation under mediation by *Agrobacterium tumefaciens*. Elements shown are important for gene expression modulations, such as 35S promoter from cauliflower mosaic virus and maize, respectively. Other elements are required for screening of transgenic plants, such as antibiotic resistance.

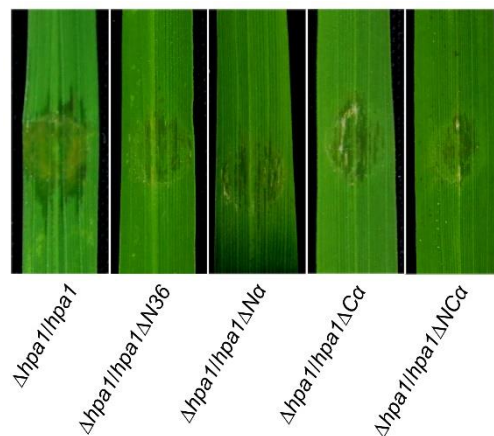

**Fig. S4.** Deletions of *hpa1* sequence regions affect the virulent function of PthXo1. Here, Rice seedlings were inoculated by leaf infiltration with every bacterial suspension of the indicated strains; leaves were photographed at 5 dpi.

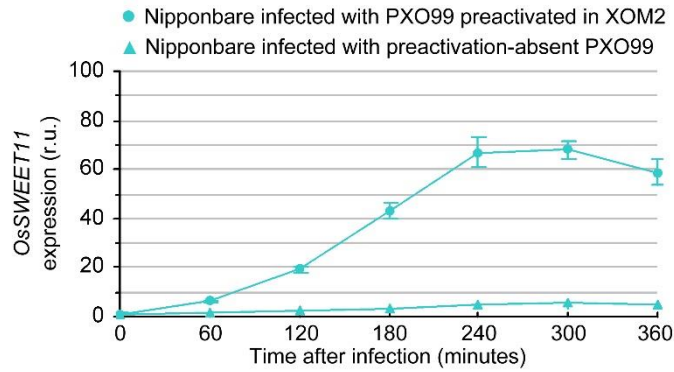

**Fig. S5.** *Xoo* preactivation is required for infection of rice protoplasts. Preactivation of POX99 cells by induction in the XOM2 medium are capable of infecting rice protoplasts but non-induced bacteria are not. Approximately  $2 \times 10^5$  protoplasts were infected by co-incubation with a bacterial suspension of the bacterial strains preactivated or not preactivated. Relative units (r.u.) of *SWEET11* gene expression in protoplasts were analyzed by RT-qPCR at the indicated time points. The average expression levels of gene expression at 0 min were defined as 1 to assess gene expression extents at the other time points. Data shown are means  $\pm$  SEMs;  $n = 9$  repetitions from 3 independent experiments.

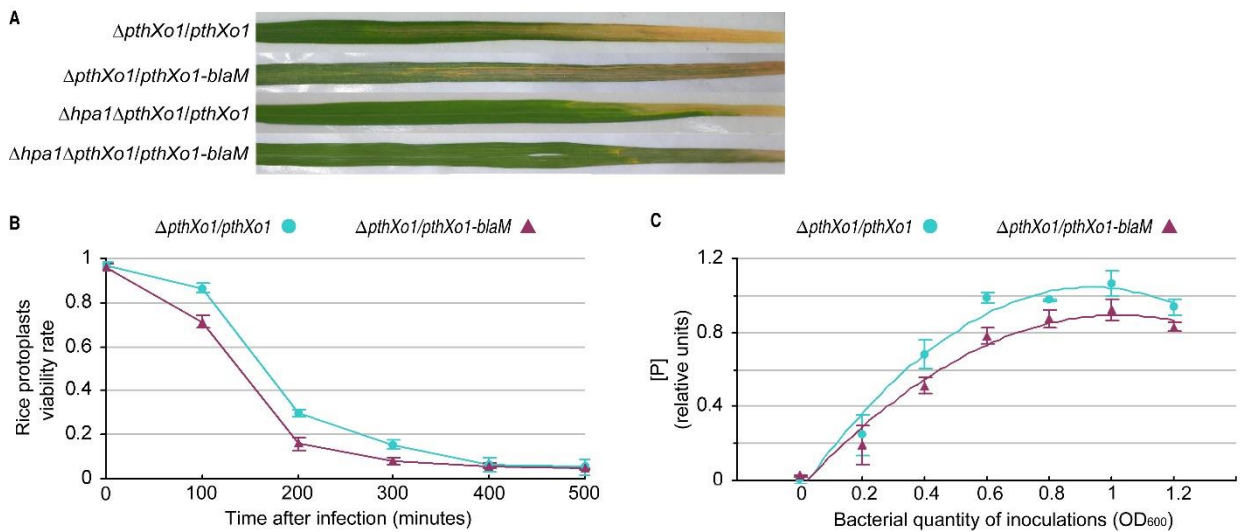

**Fig. S6.** Optimization of BlaM reporter assays. (A) Nipponbare plants were inoculated by leaf top clipping with a bacterial suspension of the indicated *Xoo* strain. Leaves were photographed at 12 dpi. (B) Nipponbare protoplasts were infected by co-incubated with the indicated bacterial strain. Bacteria had been preactivated by incubation in XOM2 medium. The viability of protoplasts was determined by the FDA staining method. (C) Correlation between bacterial density of inoculation and relative concentrations of [P], the product from enzymatic activity of TALE-BlaM. In all curves, data shown are means  $\pm$  SEMs;  $n = 9$  repetitions from 3 independent experiments.

OsPIP1;1 233-TGTGINPARSLGAAIYNKD<sup>1</sup>HAWND-257  
 OsPIP1;2 232-TGTGINPARSLGAAIYNRG<sup>1</sup>HAWND-256  
 OsPIP1;3 233-TGTGINPARSLGAAIYNRA<sup>1</sup>HAWNH-257

**Fig. S7.** Compositions in OsPIP1s.

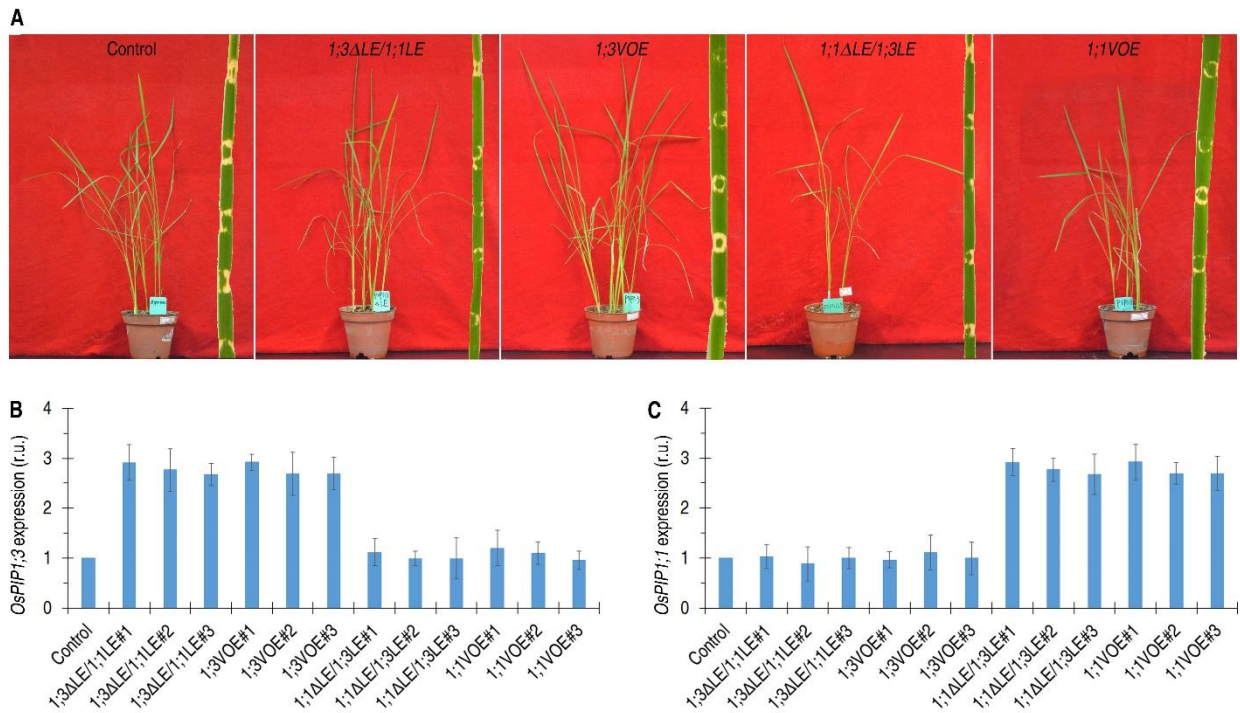

**Fig. S8.** The rice VMGOE efficiency. (A) Photos of 30-day-old Nipponbare seedlings and leaves at 15 days after transformation with the empty VMGOE vector (Control) or the recombinant vector carrying an insert of the indicated gene. The vector was constructed by using rice tungro bacilliform virus. (B, C) Gene expression was analyzed by RT-qPCR and quantified as relative unit (r.u.) in contrast to the expression defined as 1 in control. Data show are mean values  $\pm$  SEM estimates; different letters indicate significant differences by Duncan's multiple range tests;  $P < 0.01$ ;  $n = 15$  plants tested in 3 independent experiments.



**Table S1** Strains and plasmids used and created in this study

| Strains or Plasmids                                                                          | Relevant characteristics                                                                                                                                                    | Source/Reference    |
|----------------------------------------------------------------------------------------------|-----------------------------------------------------------------------------------------------------------------------------------------------------------------------------|---------------------|
| <b>Strains</b>                                                                               |                                                                                                                                                                             |                     |
| <i>Escherichia coli</i>                                                                      |                                                                                                                                                                             |                     |
| DH5 $\alpha$                                                                                 | F <sup>-</sup> 80 <i>dlacZ</i> M15( <i>lacZYA-argF</i> ) U169 <i>endA1 deoR recA1</i>                                                                                       | This lab            |
| BL21(DE3)                                                                                    | <i>hsdR17</i> (r <sub>K</sub> <sup>-</sup> m <sub>K</sub> <sup>+</sup> ) <i>phoA supE44</i> $\lambda$ <sup>-</sup> <i>thi-l gyrA96 relA1</i>                                | Novagen             |
| <i>Yeast</i>                                                                                 |                                                                                                                                                                             |                     |
| NMY51                                                                                        | MATa <i>his3D200 trp1-901 leu2-3,112 ade2 LYS2::(lexAop) 4-HIS3 ura3::(lexAop) 8-lacZ ade2::(lexAop)8-ADE2 GAL4</i>                                                         | Obrdlik et al. 2004 |
| <i>Agrobacterium tumefaciens</i>                                                             |                                                                                                                                                                             |                     |
| GV3101                                                                                       | Gent <sup>R</sup>                                                                                                                                                           | This lab            |
| <i>X. oryzae</i> pv. <i>Oryzae</i>                                                           |                                                                                                                                                                             |                     |
| PXO99 <sup>A</sup>                                                                           | Philippine race 6; azacytidine resistant clone of PXO99 <sup>A</sup> , virulent to rice cultivars Nipponbare and IRBB10                                                     | This lab            |
| P $\Delta$ <i>hpa1</i>                                                                       | PXO99 <sup>A</sup> <i>hpa1</i> unmarked mutant                                                                                                                              | This study          |
| P $\Delta$ <i>pthXo1</i>                                                                     | PXO99 <sup>A</sup> <i>pthXo1</i> unmarked mutant                                                                                                                            | This study          |
| P $\Delta$ <i>hpa1</i> $\Delta$ <i>pthXo1</i>                                                | PXO99 <sup>A</sup> <i>hpa1pthXo1</i> double unmarked mutant                                                                                                                 | This study          |
| P $\Delta$ <i>hrcU</i>                                                                       | PXO99 <sup>A</sup> <i>hrcU</i> knock-out mutant                                                                                                                             | This lab            |
| P $\Delta$ <i>hpa1/hpa1</i>                                                                  | PXO99 <sup>A</sup> <i>hpa1</i> mutant complemented with pHM <i>hpa1</i>                                                                                                     | This study          |
| P $\Delta$ <i>pthXo1/pthXo1</i>                                                              | PXO99 <sup>A</sup> <i>pthXo1</i> mutant complemented with pHM <i>pthXo1</i>                                                                                                 | This study          |
| P $\Delta$ <i>hpa1</i> $\Delta$ <i>pthXo1/hpa1/</i><br><i>pthXo1</i>                         | PXO99 <sup>A</sup> <i>hpa1pthXo1</i> mutant complemented with pHM <i>hpa1pthXo1</i>                                                                                         | This study          |
| PXO99 <sup>A</sup> / <i>avrXa10</i>                                                          | PXO99 <sup>A</sup> transformed with pHM <i>avrXa10</i>                                                                                                                      | This study          |
| P $\Delta$ <i>hpa1/avrXa10</i>                                                               | PXO99 <sup>A</sup> <i>hpa1</i> mutant transformed with pHM <i>avrXa10</i>                                                                                                   | This study          |
| P $\Delta$ <i>pthXo1/avrXa10</i>                                                             | PXO99 <sup>A</sup> <i>pthXo1</i> mutant transformed with pHM <i>avrXa10</i>                                                                                                 | This study          |
| P $\Delta$ <i>hpa1</i> $\Delta$ <i>pthXo1/</i><br><i>avrXa10</i>                             | PXO99 <sup>A</sup> <i>hpa1pthXo1</i> mutant transformed with pHM <i>avrXa10</i>                                                                                             | This study          |
| P $\Delta$ <i>hrcU/avrXa10</i>                                                               | PXO99 <sup>A</sup> <i>hrcU</i> mutant transformed with pHM <i>avrXa10</i>                                                                                                   | This study          |
| P $\Delta$ <i>pthXo1/pthXo1-cya</i>                                                          | PXO99 <sup>A</sup> <i>pthXo1</i> mutant complemented with pHM <i>pthXo1-cya</i>                                                                                             | This study          |
| P $\Delta$ <i>hpa1</i> $\Delta$ <i>pthXo1/</i><br><i>pthXo1-cya</i>                          | PXO99 <sup>A</sup> <i>hpa1pthXo1</i> mutant complemented with pHM <i>pthXo1-cya</i>                                                                                         | This study          |
| P $\Delta$ <i>hpa1</i> $\Delta$ <i>pthXo1/hpa1/</i><br><i>pthXo1-cya</i>                     | PXO99 <sup>A</sup> <i>hpa1pthXo1</i> mutant complemented with pHM <i>hpa1pthXo1-cya</i>                                                                                     | This study          |
| P $\Delta$ <i>hrcU/</i><br><i>pthXo1-cya</i>                                                 | PXO99 <sup>A</sup> <i>hrcU</i> mutant transformed with pHM <i>pthXo1-cya</i>                                                                                                | This study          |
| PXO99 <sup>A</sup> / <i>avrXa10-cya</i>                                                      | PXO99 <sup>A</sup> transformed with pHM <i>avrXa10-cya</i>                                                                                                                  | This study          |
| P $\Delta$ <i>hpa1/avrXa10-cya</i>                                                           | PXO99 <sup>A</sup> <i>hpa1</i> mutant transformed with pHM <i>avrXa10-cya</i>                                                                                               | This study          |
| P $\Delta$ <i>pthXo1/avrXa10-cya</i>                                                         | PXO99 <sup>A</sup> <i>pthXo1</i> mutant transformed with pHM <i>avrXa10-cya</i>                                                                                             | This study          |
| P $\Delta$ <i>hrcU/avrXa10-cya</i>                                                           | PXO99 <sup>A</sup> <i>hrcU</i> mutant transformed with pHM <i>avrXa10-cya</i>                                                                                               | This study          |
| P $\Delta$ <i>pthXo1/</i><br><i>pthXo1-blaM</i>                                              | PXO99 <sup>A</sup> <i>pthXo1</i> mutant complemented with pHM <i>pthXo1-blaM</i>                                                                                            | This study          |
| P $\Delta$ <i>hpa1</i> $\Delta$ <i>pthXo1/</i><br><i>pthXo1-blaM</i>                         | PXO99 <sup>A</sup> <i>hpa1pthXo1</i> mutant complemented with pHM <i>pthXo1-blaM</i>                                                                                        | This study          |
| P $\Delta$ <i>hrcU/</i><br><i>pthXo1-blaM</i>                                                | PXO99 <sup>A</sup> <i>hrcU</i> mutant transformed with pHM <i>pthXo1-blaM</i>                                                                                               | This study          |
| PXO99 <sup>A</sup> / <i>avrXa10-blaM</i>                                                     | PXO99 <sup>A</sup> transformed with pHM <i>avrXa10-blaM</i>                                                                                                                 | This study          |
| P $\Delta$ <i>hpa1/avrXa10-blaM</i>                                                          | PXO99 <sup>A</sup> <i>hpa1</i> mutant transformed with pHM <i>avrXa10-blaM</i>                                                                                              | This study          |
| P $\Delta$ <i>hrcU/avrXa10-blaM</i>                                                          | PXO99 <sup>A</sup> <i>hrcU</i> mutant transformed with pHM <i>avrXa10-blaM</i>                                                                                              | This study          |
| P $\Delta$ <i>hpa1/hpa1</i> $\Delta$ <i>N36</i>                                              | PXO99 <sup>A</sup> <i>hpa1</i> mutant complemented with pHM <i>hpa1</i> $\Delta$ <i>N36</i> ( <i>hpa1</i> sequence with a deletion of 1-36 sites in N-terminal)             | This study          |
| P $\Delta$ <i>hpa1/hpa1</i> $\Delta$ <i>Na</i>                                               | PXO99 <sup>A</sup> <i>hpa1</i> mutant complemented with pHM <i>hpa1</i> $\Delta$ <i>Na</i> ( <i>hpa1</i> sequence with a deletion of $\alpha$ -helix in N-terminal)         | This study          |
| P $\Delta$ <i>hpa1/hpa1</i> $\Delta$ <i>Ca</i>                                               | PXO99 <sup>A</sup> <i>hpa1</i> mutant complemented with pHM <i>hpa1</i> $\Delta$ <i>Ca</i> ( <i>hpa1</i> sequence with a deletion of $\alpha$ -helix in C-terminal)         | This study          |
| P $\Delta$ <i>hpa1/hpa1</i> $\Delta$ <i>NCa</i>                                              | PXO99 <sup>A</sup> <i>hpa1</i> mutant complemented with pHM <i>hpa1</i> $\Delta$ <i>NCa</i> ( <i>hpa1</i> sequence with two deletions of $\alpha$ -helices in NC-terminals) | This study          |
| P $\Delta$ <i>hpa1</i> $\Delta$ <i>pthXo1/</i><br><i>pthXo1-cya/hpa1</i> $\Delta$ <i>N36</i> | PXO99 <sup>A</sup> <i>hpa1pthXo1</i> mutant complemented with pHM <i>hpa1</i> $\Delta$ <i>N36-pthXo1-cya</i>                                                                | This study          |

|                                           |                                                                                                                                                                                                             |                                  |
|-------------------------------------------|-------------------------------------------------------------------------------------------------------------------------------------------------------------------------------------------------------------|----------------------------------|
| <i>PΔhpa1ΔpthXo1/pthXo1-cya/hpa1ΔNa</i>   | PXO99 <sup>A</sup> <i>hpa1 pthXo1</i> mutant complemented with pHM <i>hpa1ΔNa-pthXo1-cya</i>                                                                                                                | This study                       |
| <i>PΔhpa1ΔpthXo1/pthXo1-cya/hpa1ΔCa</i>   | PXO99 <sup>A</sup> <i>hpa1 pthXo1</i> mutant complemented with pHM <i>hpa1ΔCa-pthXo1-cya</i>                                                                                                                | This study                       |
| <i>PΔhpa1ΔpthXo1/pthXo1-cya/hpa1ΔNCa</i>  | PXO99 <sup>A</sup> <i>hpa1 pthXo1</i> mutant complemented with pHM <i>hpa1ΔNCa-pthXo1-cya</i>                                                                                                               | This study                       |
| <i>PΔhpa1ΔpthXo1/pthXo1-blaM/hpa1</i>     | PXO99 <sup>A</sup> <i>hpa1 pthXo1</i> mutant complemented with pHM <i>hpa1-pthXo1-blaM</i>                                                                                                                  | This study                       |
| <i>PΔhpa1ΔpthXo1/pthXo1-blaM/hpa1ΔN36</i> | PXO99 <sup>A</sup> <i>hpa1 pthXo1</i> mutant complemented with pHM <i>hpa1ΔN36-pthXo1-blaM</i>                                                                                                              | This study                       |
| <i>PΔhpa1ΔpthXo1/pthXo1-blaM/hpa1ΔNa</i>  | PXO99 <sup>A</sup> <i>hpa1 pthXo1</i> mutant complemented with pHM <i>hpa1ΔNa-pthXo1-blaM</i>                                                                                                               | This study                       |
| <i>PΔhpa1ΔpthXo1/pthXo1-blaM/hpa1ΔCa</i>  | PXO99 <sup>A</sup> <i>hpa1 pthXo1</i> mutant complemented with pHM <i>hpa1ΔCa-pthXo1-blaM</i>                                                                                                               | This study                       |
| <i>PΔhpa1ΔpthXo1/pthXo1-blaM/hpa1ΔNCa</i> | PXO99 <sup>A</sup> <i>hpa1 pthXo1</i> mutant complemented with pHM <i>hpa1ΔNCa-pthXo1-blaM</i>                                                                                                              | This study                       |
| Plasmids                                  |                                                                                                                                                                                                             |                                  |
| pK18 <i>sacB</i>                          | Suicide vector derivative from pK18mobGII, <i>sacB</i> <sup>+</sup> , Km <sup>R</sup>                                                                                                                       | This lab                         |
| pHM1                                      | Broad-host range vector with pUC19 polylinker, Sp <sup>R</sup>                                                                                                                                              | This lab                         |
| pZW <i>pthXo1</i>                         | <i>PthXo1</i> fused to <i>lacZ</i> promoter of pBluescript II KS(+)                                                                                                                                         | Yang et al. 2006                 |
| pZW <i>avrXa10</i>                        | <i>AvrXa10</i> fused to <i>lacZ</i> promoter of pBluescript II KS(+)                                                                                                                                        | Makino et al. 2006               |
| pZW <i>pthXo1-cya</i>                     | <i>Cya</i> tag inserted in the <i>Sac</i> I site of pZW <i>pthXo1</i>                                                                                                                                       | This study                       |
| pZW <i>avrXa10-cya</i>                    | <i>Cya</i> tag inserted in the <i>Sac</i> I site of pZW <i>avrXa10</i>                                                                                                                                      | This study                       |
| pZW <i>pthXo1-blaM</i>                    | <i>BlaM</i> tag inserted in the <i>Sal</i> I site of pZW <i>pthXo1</i>                                                                                                                                      | This study                       |
| pZW <i>avrXa10-blaM</i>                   | <i>BlaM</i> tag inserted in the <i>Sal</i> I site of pZW <i>avrXa10</i>                                                                                                                                     | This study                       |
| pXNubG-gate21(SUS1)                       | Prey vector (8194 bp), <i>TRP1</i> , Amp <sup>R</sup> , 2μ                                                                                                                                                  | Obrdlik et al. 2004              |
| pNubGX-gate32(SUS2)                       | Prey vector (8177 bp), <i>TRP1</i> , Amp <sup>R</sup> , 2μ                                                                                                                                                  | Obrdlik et al. 2004              |
| pMetYCub-gate(SUS5)                       | Bait vector (10033 bp), <i>LEU2</i> , Amp <sup>R</sup> , CEN/ARS                                                                                                                                            | Obrdlik et al. 2004              |
| pKAT1-Cub(SUS6)                           | Control vector, <i>LEU2</i> , Amp <sup>R</sup> , CEN/ARS                                                                                                                                                    | Obrdlik et al. 2004              |
| pNubG-KAT1(SUS8)                          | Postive control vector, <i>TRP1</i> , Amp <sup>R</sup> , CEN                                                                                                                                                | Obrdlik et al. 2004              |
| pNubG-SUT2(SUS9)                          | Negative control vector, <i>TRP1</i> , Amp <sup>R</sup> , CEN                                                                                                                                               | Obrdlik et al. 2004              |
| pMD18-T simple                            | pUC <i>ori</i> , cloning vector, Amp <sup>R</sup>                                                                                                                                                           | Takara                           |
| pMS107                                    | pLC20H containing the PCR fragment of <i>cyaA</i> from nucleotide 4 to nucleotide 1221, Amp <sup>R</sup>                                                                                                    | This lab                         |
| pET30a (+)                                | pBR322 origin, <i>T7</i> promoter His-tag, Km <sup>R</sup>                                                                                                                                                  | Novagen                          |
| pET41a (+)                                | pBR322 origin, <i>T7</i> promoter His-tag, GST-tag, Km <sup>R</sup>                                                                                                                                         | Novagen                          |
| pCAMBIA1300                               | Binary vector, <i>35S</i> promoter, Km <sup>R</sup> , Hyg <sup>R</sup>                                                                                                                                      | This lab                         |
| pCAMBIA1301                               | Binary vector, <i>35S</i> promoter, Km <sup>R</sup> , Hyg <sup>R</sup>                                                                                                                                      | This lab                         |
| pCAMBIA1301-YFP <sup>N</sup>              | pCAMBIA1301 inserted with N-terminal (1-155) of YFP                                                                                                                                                         | This lab                         |
| pCAMBIA1301-YFP <sup>C</sup>              | pCAMBIA1301 inserted with N-terminal (156-239) of YFP                                                                                                                                                       | This lab                         |
| pCAMBIA1300-YFP                           | pCAMBIA1300 inserted with YFP tag                                                                                                                                                                           | This lab                         |
| pTCK303                                   | Binary vector, <i>Ubil</i> promoter, Km <sup>R</sup> , Hyg <sup>R</sup>                                                                                                                                     | This lab                         |
| pTL-n                                     | TALEN construction vector, Tet <sup>R</sup>                                                                                                                                                                 | Li et al. 2012                   |
| psk/TALEN                                 | TALEN construction vector, Amp <sup>R</sup>                                                                                                                                                                 | Li et al. 2012                   |
| p1300-35S                                 | TALEN construction vector, <i>35S</i> promoter, Km <sup>R</sup>                                                                                                                                             | Li et al. 2012                   |
| pEH3- <i>Ubil</i>                         | TALEN construction vector, <i>Ubil</i> promoter, Amp <sup>R</sup>                                                                                                                                           | Li et al. 2012                   |
| pRTBV-VMGOE                               | Gene overexpression vector adopted from the tungro bacilliform virus-mediated gene silencing vector by insertion of full-length, instead of partial short sequence, of a gene to be tested, Km <sup>R</sup> | Purkayastha <i>et al.</i> , 2010 |

**Table S2** Information on genes tested and primers used in this study

|                                                                                                                                                                                   | Primers / product size (bp) / subjects                                                                                                                                                                                                                                                                |                                                                                                                                                                                                                                                       |
|-----------------------------------------------------------------------------------------------------------------------------------------------------------------------------------|-------------------------------------------------------------------------------------------------------------------------------------------------------------------------------------------------------------------------------------------------------------------------------------------------------|-------------------------------------------------------------------------------------------------------------------------------------------------------------------------------------------------------------------------------------------------------|
| <i>hpa1</i> (ACD56757)                                                                                                                                                            | 5'-ATGAATTCTTTGAACACACAAT-3', 5'-TTACTGCATCGATGCGCTGTTCG-3' / 420 / coding sequence cloning by PCR                                                                                                                                                                                                    |                                                                                                                                                                                                                                                       |
|                                                                                                                                                                                   | 5'-TTCTCAACAACGCCCCGCGGATTTG -3',<br>5'-TTACTGCATCGATGCGCTGTTCG-3' / 639 / promoter + coding sequence                                                                                                                                                                                                 |                                                                                                                                                                                                                                                       |
|                                                                                                                                                                                   | Upstream homologous arm:<br>5'-CGGGATCCGCTGCTGCAAATAGAATACG-3' ( <i>BamH I</i> ),<br>5'-GTAGGGGCGACCAACAGTTCTCGTGACGATTCCTCTCTGATT-3' / 537,<br>Downstream homologous arm:<br>5'-AATCAGAGAGGAATCGTACGAGAAGTGTGGTCCGCTTAC-3',<br>5'-GCTCTAGATCACTCGCACATGCTGGTTCT-3' ( <i>Xba I</i> ) / 536 / deletion |                                                                                                                                                                                                                                                       |
|                                                                                                                                                                                   | 5'-AACTGCAGTTCTCAACAACGCCCCGCGGATTTG-3' ( <i>Pst I</i> ),<br>5'-GGGGTACCTTACTTATCGTGCATCGATGCGCTGTTCG-3' ( <i>Kpn I</i> ) / 639 / complementation                                                                                                                                                     |                                                                                                                                                                                                                                                       |
|                                                                                                                                                                                   | 5'-acaagttgtacaaaaagcaggctctccaaccacc(homologous arm)ATGAATTCTTTGAACACACAAT-3',<br>5'-tccgccaccaccaacccttgtacaagaaagctgggta(homologous arm)CTGCATCGATGCGCTGTTCG-3' / 417 / SUB Y2H                                                                                                                    |                                                                                                                                                                                                                                                       |
|                                                                                                                                                                                   | 5'-CGGGGTACCATGAATTCTTTGAACACACAAT-3' ( <i>Kpn I</i> ),<br>5'-CGCGGATCCCTGCATCGATGCGCTGTTCG-3' ( <i>BamH I</i> ) / 417 / BiFC                                                                                                                                                                         |                                                                                                                                                                                                                                                       |
|                                                                                                                                                                                   | 5'-CGGGGTACCATGAATTCTTTGAACACACAAT-3' ( <i>Kpn I</i> ),<br>5'-CGCGGATCCCTTACTTATCGTGCATCGATGCGCTGTTCG-3' ( <i>BamH I</i> ) / 420 / Co-IP                                                                                                                                                              |                                                                                                                                                                                                                                                       |
|                                                                                                                                                                                   | 5'-CGCGGATCCATGAATTCTTTGAACACACAAT-3' ( <i>BamH I</i> ),<br>5'-CCCAAGCTTTTACTGCATCGATGCGCTGTTCG-3' ( <i>Hind III</i> ) / 420 / GST-Pulldown.                                                                                                                                                          |                                                                                                                                                                                                                                                       |
|                                                                                                                                                                                   | <i>hpa1ΔN</i> (1-36)                                                                                                                                                                                                                                                                                  | 5'-TTCTCAACAACGCCCCGCGGATTTG -3',<br>5'-ACTGGTCCAGTTGCTTTTCCATCGTGACGATTCCTCTCTGATTA-3' / 219 / promoter<br>5'-TAATCAGAGAGGAATCGTACGATGGAAAAGCAACTGGACCAGT-3',<br>5'-CTGCATCGATGCGCTGTTCG-3' / 309 / <i>ΔN</i> (1-36) coding sequence / recombination |
|                                                                                                                                                                                   |                                                                                                                                                                                                                                                                                                       | 5'-AACTGCAGTTCTCAACAACGCCCCGCGGATTTG-3' ( <i>Pst I</i> ),<br>5'-GGGGTACCTTACTTATCGTGCATCGATGCGCTGTTCG-3' ( <i>Kpn I</i> ) / 531 / complementation                                                                                                     |
| 5'-acaagttgtacaaaaagcaggctctccaaccacc(homologous arm)ATGAAAAGCAACTGGACCAGT-3',<br>5'-tccgccaccaccaacccttgtacaagaaagctgggta(homologous arm)CTGCATCGATGCGCTGTTCG-3' / 309 / SUB Y2H |                                                                                                                                                                                                                                                                                                       |                                                                                                                                                                                                                                                       |
| 5'-CGGGGTACCATGAAAAGCAACTGGACCAGTTGC-3' ( <i>Kpn I</i> ),<br>5'-CGCGGATCCCTGCATCGATGCGCTGTTCG-3' ( <i>BamH I</i> ) / 309 / BiFC                                                   |                                                                                                                                                                                                                                                                                                       |                                                                                                                                                                                                                                                       |
| 5'-CGGGGTACCATGAAAAGCAACTGGACCAGTTGC-3' ( <i>Kpn I</i> ),<br>5'-CGCGGATCCCTTACTTATCGTGCATCGATGCGCTGTTCG-3' ( <i>BamH I</i> ) / 312 / Co-IP                                        |                                                                                                                                                                                                                                                                                                       |                                                                                                                                                                                                                                                       |
| 5'-CGCGGATCCATGAAAAGCAACTGGACCAGTTGC-3' ( <i>BamH I</i> ),<br>5'-CCCAAGCTTTTACTGCATCGATGCGCTGTTCG-3' ( <i>Hind III</i> ) / 312 / GST-Pulldown                                     |                                                                                                                                                                                                                                                                                                       |                                                                                                                                                                                                                                                       |
| <i>hpa1ΔNa-helix</i>                                                                                                                                                              |                                                                                                                                                                                                                                                                                                       | 5'-TTCTCAACAACGCCCCGCGGATTTG -3',<br>5'-CCTCAGCATTTTTGCTCGACTGCGAGATGCCCTGGTTGCCG-3' / 327 / promoter + coding sequence (1-108)<br>5'-GCGGCAACCAGGGCATCTCGCAGTCGAGCAAAAATGCTGAGG-3',                                                                  |





|                                           |                                                                                                                                                                                                                                                                                                                                                                                     |
|-------------------------------------------|-------------------------------------------------------------------------------------------------------------------------------------------------------------------------------------------------------------------------------------------------------------------------------------------------------------------------------------------------------------------------------------|
|                                           | GAAGGAGGAGGAT-3',<br>5'-TCCGCCACCACCAACCCTTTGTACAAGAAAGCTGGGTACGACCTG<br>CTCTTGAATGGA-3' / 864 / SUB Y2H                                                                                                                                                                                                                                                                            |
| <i>OsPIP1;3</i> (AK102174)                | 5'-ATGGAGGGGAAGGAGGAGGATGTGAGG-3',<br>5'-TTAGTCCCGGCTCTTGAAGGGGATTGC-3' / 867 / cloning                                                                                                                                                                                                                                                                                             |
|                                           | 5'-CGGGGTACCATGGAGGGGAAGGAGGAGGAT-3' ( <i>Kpn I</i> ),<br>5'-GCTCTAGAGTCCCGGCTCTTGAAGGGGAT-3' ( <i>Xba I</i> ) / 864 / overexpression,<br>BiFC and Co-IP                                                                                                                                                                                                                            |
|                                           | 5'-GGGGTACCGGCATGATCTTCGCGCTCGTCTA-3' ( <i>Kpn I</i> ),<br>5'-CGGGATCCGTGGCGGAGAAGACGGTGTAGAC-3' ( <i>BamH I</i> ) / 302<br>5'-GGACTAGTGGCATGATCTTCGCGCTCGTCTA-3' ( <i>Spe I</i> ),<br>5'-CGAGCTCGTGGCGGAGAAGACGGTGTAGAC-3' ( <i>Sac I</i> ) / 302 / hairpin<br>construction                                                                                                        |
|                                           | 5'-GCCGTCCTCCTCGTCCACCTC-3', 5'-CGATGAACGGACCAACCCAGA-3' /<br>142 / real-time RT-PCR                                                                                                                                                                                                                                                                                                |
|                                           | 5'-acaagttgtacaaaaagcaggctctccaaccacc(homologous<br>arm)ATGGAGGGGAAGGAGGAGGAT-3',<br>5'-tccgccaccaccaaccactttgtacaagaaagctgggta(homologous<br>arm)GTCCCGGCTCTTGAAGGGGAT-3' / 864 / SUB Y2H                                                                                                                                                                                          |
|                                           | 5'-CGGGGTACCATGGAGGGGAAGGAGGAGGAT-3' ( <i>Kpn I</i> ),<br>5'-GCTCTAGATTAagcgtagctctgggacgtatgggta(HA)GTCCCGGCTCTTGAAGGG<br>GAT-3' ( <i>Xba I</i> ) / 867 / Co-IP and expression                                                                                                                                                                                                     |
|                                           | 5'-GACGCGTATGGAGGGGAAGGAGGAGGAT-3' ( <i>Mlu I</i> ),<br>5'-CCGGTTAATTAAGTCCCGGCTCTTGAAGGGGAT-3' ( <i>Pac I</i> )/864/Vigs mediated<br>overexpression                                                                                                                                                                                                                                |
| TALEN ( <i>OsPIP1;3</i> )                 | 5'-AAAGAAGCAGGAAGCCACTC-3', 5'-CTGCATCGCCATGTAGAACC-3' /<br>554 / cloning                                                                                                                                                                                                                                                                                                           |
|                                           | 5'-AGTAGAAAGAAGAAGAGGCAAATT-3' / sequencing                                                                                                                                                                                                                                                                                                                                         |
| <i>OsPIP1;3Δ(N+TM1)-<br/>1;1(N+TM1)</i>   | 5'-ATGGAGGGGAAGGAGGAGGACGT-3',<br>5'-CGCACTTGGACGCCGACTTGTGACCCCATGACGGTGAGGATG-3' / 234<br>/ <i>OsPIP1;1</i> NH3 + TM1<br>5'-CATCCTCACCGTCATGGGGGTCAACAAGTCGGCGTCCAAGTGCG-3',<br>5'-GTCCCGGCTCTTGAAGGGGATT-3' / 633 / <i>OsPIP1;3</i> DOWN                                                                                                                                         |
| <i>OsPIP1;3Δ(LA+TM2)-<br/>1;1(LA+TM2)</i> | 5'-ATGGAGGGGAAGGAGGAGGATGT-3',<br>5'-CGCACTTGGAGGAGGACTTGGACACCCCATCACCGTCAGGATG-3' / 231<br>/ <i>OsPIP1;3</i> up<br>5'-CATCCTGACGGTGATGGGGGTGTCCAAGTCCTCCTCCAAGTGCG-3',<br>5'-CGAACGTCACCGCCGGTTGATGTGTCTCCGGAGATGCCGGC-3' / 111 /<br><i>OsPIP1;1</i> LA + TM2<br>5'-GCCGGCATCTCCGGAGGACACATCAACCCGGCGGTGACGTTCCG-3',<br>5'-GTCCCGGCTCTTGAAGGGGATT-3' / 522 / <i>OsPIP1;3</i> down |
| <i>OsPIP1;3Δ(LB+TM3)-<br/>1;1(LB+TM3)</i> | 5'-ATGGAGGGGAAGGAGGAGGATGT-3',<br>5'-CAAAAGTAACTGCTGGGTTGATGTGCCCGCCGGAGATGCCGGC-3' / 342 /<br><i>OsPIP1;3</i> up<br>5'-GCCGGCATCTCCGGCGGGCACATCAACCCAGCAGTTACTTTTG-3',<br>5'-ACAACCCCGCTGGAACCCCTTCACAACTCCAGCTCCGCAGATG-3' / 114<br>/ <i>OsPIP1;1</i> LB + TM3<br>5'-CATCTGCGGAGCTGGAGTTGTGAAGGGGTTCCAGCGGGGTTGT-3',<br>5'-GTCCCGGCTCTTGAAGGGGATT-3' / 408 / <i>OsPIP1;3</i> down |
| <i>OsPIP1;3Δ(LC+TM4)-<br/>1;1(LC+TM4)</i> | 5'-ATGGAGGGGAAGGAGGAGGATGT-3',<br>5'-TACAGACCCTGCTGGAAGCCCTTACCACGCCGGCGCCGCAGAT-3' / 456<br>/ <i>OsPIP1;3</i> up<br>5'-ATCTGCGGCGCCGGCGTGGTGAAGGGCTTCCAGCAGGGTCTGTA-3',                                                                                                                                                                                                            |

|                                                                                    |                                                                                                                                                                                                                                                                                                                                                                             |
|------------------------------------------------------------------------------------|-----------------------------------------------------------------------------------------------------------------------------------------------------------------------------------------------------------------------------------------------------------------------------------------------------------------------------------------------------------------------------|
|                                                                                    | 5'-TTGCGCTTGGCGTCGGTGGCTGAGAAGACGGTGTAGACCAGG-3' / 132 / <i>OsPIP1;1</i> LC + TM4<br>5'-CCTGGTCTACACCGTCTTCTCAGCCACCGACGCCAAGCGCAA-3',<br>5'-GTCCCGGCTCTTGAAGGGGATT-3' / 276 / <i>OsPIP1;3</i> down                                                                                                                                                                         |
| <i>OsPIP1;3</i> ( $\Delta$ LD+TM5)-<br><i>1;1</i> (LD+TM5)                         | 5'-ATGGAGGGGAAGGAGGAGGATGT-3',<br>5'-CATTCTCTTGGCATCAGTGGCGGAGAAGACGGTGTAGACGAG-3' / 588 / <i>OsPIP1;3</i> up<br>5'-CTCGTCTACACCGTCTTCTCCGCCACTGATGCCAAGAGGAATG-3',<br>5'-CGGGTTGATGCCGGTGCCGGTGATGGGGATGGTGGCCAGGTG-3' / 105 / <i>OsPIP1;1</i> LD + TM5<br>5'-CACCTGGCCACCATCCCCATCACCGGCACCGGCATCAACCCCG-3',<br>5'-GTCCCGGCTCTTGAAGGGGATT-3' / 171 / <i>OsPIP1;3</i> down |
| <i>OsPIP1;3</i> ( $\Delta$ LE $\rightarrow$ C)-<br><i>1;1</i> (LE $\rightarrow$ C) | 5'-ATGGAGGGGAAGGAGGAGGATGT-3',<br>5'-CTGGTTGATGCCAGTACCGGTGATGGGGATGGTGGCGAGGTG-3' / 693 / <i>OsPIP1;3</i> up<br>5'-CACCTCGCCACCATCCCCATCACCGGTACTGGCATCAACCCAG-3',<br>5'-AGACCTGCTCTTGAATGGGATCG-3' / 171 / <i>OsPIP1;1</i> LE + TM6 + COOH                                                                                                                                |
| <i>OsPIP1;3</i> $\Delta$ LE-1; <i>1</i> LE                                         | 5'-ATGGAGGGGAAGGAGGAGGATGT-3',<br>5'-GACCAACCCAGAAAATCCAGTGGTCATTCCAGGCATGGTCCTT-3' / 768 / <i>OsPIP1;3</i> $\Delta$ LE-1; <i>1</i> LE up<br>5'-AAGGACCATGCCTGGAATGACCACTGGATTTTCTGGTTGGTC-3',<br>5'-GTCCCGGCTCTTGAAGGGGA-3' / 96 / <i>OsPIP1;3</i> TM6 + COOH                                                                                                              |
| <i>SWEET11</i> (AK070510)                                                          | 5'-TGGTTCTGCTACGGCCTCTT-3',<br>5'-GGTACCAGAAGTAGAGCCCCATCT-3' / 103 / real-time RT-PCR                                                                                                                                                                                                                                                                                      |
| <i>OsEF1<math>\alpha</math></i><br>(AF030517)                                      | 5'-CGTGCTGTGGGTCGTGTTG-3', 5'-TCCTGGAGAGCCTCGTGGTG-3' / 120 / real-time RT-PCR                                                                                                                                                                                                                                                                                              |



CTGACCCCGGACCAGGTGGTGGCCATCGCCAGCAATATTGGCGGCAAGCAGGCTCTTGAAAACGGTGCAGCGGCTGTTGCCGGTGTGTGCCAGGACCATGGC  
CTGACCCCGGACCAAGTCGTGGCCATCGCCAGCCACGATGGCGGCAAGCAGGCGTTGAAAACGGTGCAGCGGCTGTTGCCGGTGTGTGCCAGGCCCATGGC  
CTGACCCCGGCCAAGTGGTGGCCATCGCCAGCAATGGCGGCGGCAAGCAGGCGCTGAAAACGGTGCAGCGGCTGTTGCCGGTGTGTGCCAGGCCCATGGC  
CTGACCCCGGACCAAGTGGTGGCCATCGCCAGCAATGGCGGCGGCAAGCAGGCTGTGAAAACGGTGCAGCGGCTGTTGCCGGTGTGTGCCAGGCCCATGGC  
CTGACCCCGGCCAAGTGGTGGCCATCGCCAGCAATGGCGGCGGCAAGCAGGCGCTGAAAACGGTGCAGCGGCTGTTGCCGGTGTGTGCCAGGCCCATGGC  
CTGACCCCGGCCAAGTGGTGGCCATCGCCAGCAATGGCGGCGGCAAGCAGGCGCTGAAAACGGTGCAGCGGCTGTTGCCGGTGTGTGCCAGGCCCATGGC  
CTGACCCCGGACCAAGTCGTGGCCATCGCCAGCCACGATGGCGGCAAGCAGGCGCTGAAAACGGTGCAGCGGCTGTTGCCGGTGTGTGCCAGGACCATGGC  
CTGACCCCGGACCAAGTGGTGGCCATCGCCAGCAATATTGGCGGCAAGCAGGCTCTTGAAAACGGTGCAGCGGCTGTTGCCGGTGTGTGCCAGGACCATGGC  
CTGACCCCGGACCAAGTCGTGGCCATCGCCAGCCACGATGGCGGCAAGCAGGCGTTGAAAACGGTGCAGCGGCTGTTGCCGGTGTGTGCCAGGACCATGGC  
CTGACCCCGAACCAAGTGGTGGCCATCGCCAGCAATGGCGGCAAGCAGGCGCTGAGAGCATTGTTGCCAGTTATCTCGCCCTGATCCGGCGTTGGCCGGC  
TTGACCAACGACCACCTCGTCGCTTGGCCTGCCTCGGCGGACGCTCTGCGTGGATGCAGTGAAAAAGGATTGCCGCACGCGCCGCTTGATCAAAAGA  
ACCAATCGCCGATTCCCGAACGCACATCCCATCGGTTGCCGATCCCAACTAGTCAAAGTGAAGTGGAGGAGAAGAACTGAACTTCGTATAAATTG  
AAATATGTGCCTCATGAATATATTGAATTAATTGAAATTGCCAGAAATCCCACTCAGGATAGAATTCTTGAAATGAAGGTAATGAAATTTTTATGAAAGTT  
TATGGATATAGAGGTGAGCATTGGGTGGATCAAGGAAACCGGACGGAGCAATTTATACTGTGGATCTCCTATTGATTACGGTGTGATCGTGGATACTAAG  
GCTTATAGCGGAGGTTATAATCTGCCAATTGGCCAAGCAGGAGAAATGCAACGATATGTCGAAGAAAATCAAACACGAAACAAACATATCAACCCTAATGAA  
TGGTGGAAAGTCTATCCATCTTCTGTAACGGAAATTAAGTTTTATTTGTGAGTGGTCACTTTAAAGGAACTACAAAGCTCAGCTTACACGATTAATCAT  
ATCACTAATTGTAATGGAGCTGTTCTTAGTGTAGAAGAGCTTTAATTTGGTGGAGAAATGATTAAGCCGGCACATTAACCTTAGAGGAAGTGAGACGGAAA  
TTAATAACGGCGAGATAAACTTTAATGAGAGCTC
